# Supplementary material
Source: HighWire-hosted journal article supplement (https://svn.smart01.highwire.org/content/7/1/e001122)
Supplement: inline-supplementary-material-1 [file inline-supplementary-material-1.pdf]

### Literature search strategy

Databases searched included: Ovid MEDLINE(R) and Epub Ahead of Print, In-Process & Other Non-Indexed Citations and Daily, Ovid Embase, Ovid Cochrane Central Register of Controlled Trials, Ovid Cochrane Database of Systematic Reviews, and Scopus.

Search criteria/terms used

- 1 Carotid Stenosis/
- 2 Endarterectomy, Carotid/
- 3 1 and 2
- 4 ((mild or low-grade) adj5 (stenos\* or obstruct\* or plaque\* or occlusion\* or constrict\* or obliterate\* or narrowing\* or ulcer\*)).ab,kw,ti.
- 5 3 and 4
- 6 limit 5 to english language
